# Supplementary material for: Solvent dependent ordering of poly(3-dodecylthiophene) in thin films
Source: Royal Society of Chemistry journal article supplement (doi:10.1039/c5sm00595g), 2015-01-01
Supplement: c5sm00595g1.pdf [file c5sm00595g1.pdf]

## Supporting Information

### Solvent dependent ordering of poly(3-dodecylthiophene) in thin films

I. Roy and S. Hazra\*

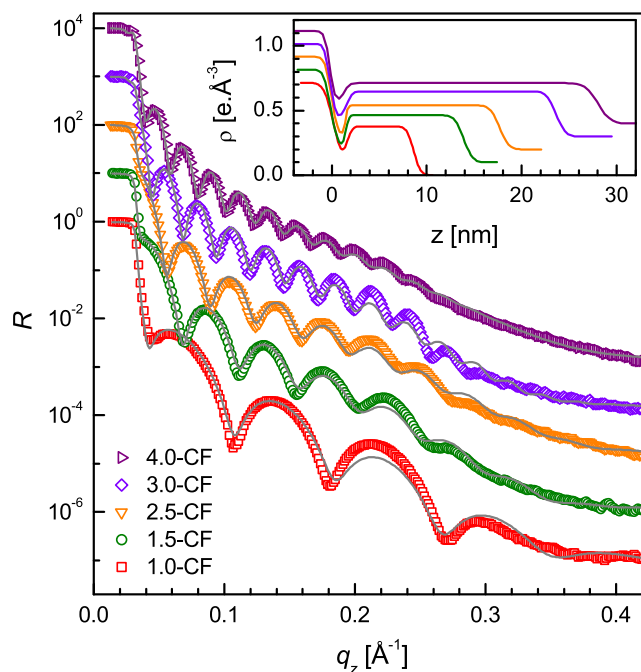

**Fig. S1** XR data (different symbols) and analyzed curves (solid line) of the spin-coated P3DDT thin films deposited from solutions of different concentrations of polymer in chloroform (CF) solvent. Analysis has been carried out considering substrate and two layers. Inset: corresponding analyzed EDPs. Curves and profiles are shifted vertically for clarity.

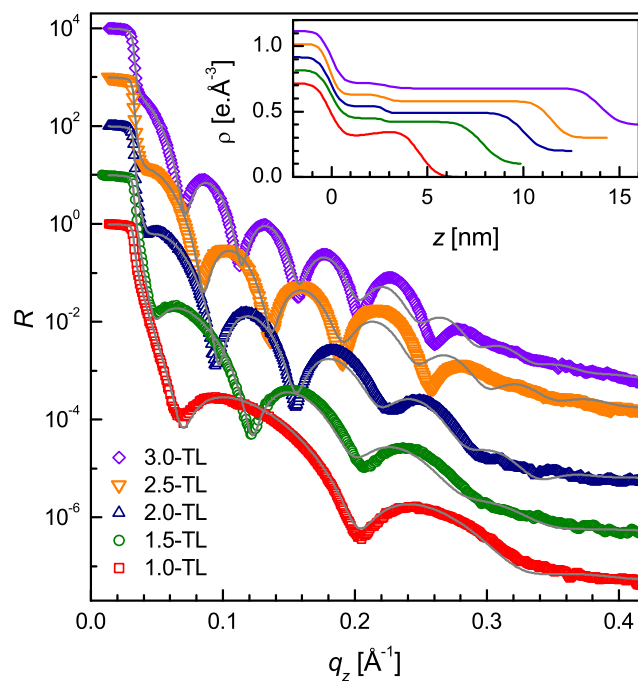

**Fig. S2** XR data (different symbols) and analyzed curves (solid line) of the spin-coated P3DDT thin films deposited from solutions of different concentrations of polymer in toluene (TL) solvent. Analysis has been carried out considering substrate and two layers. Inset: corresponding analyzed EDPs. Curves and profiles are shifted vertically for clarity.

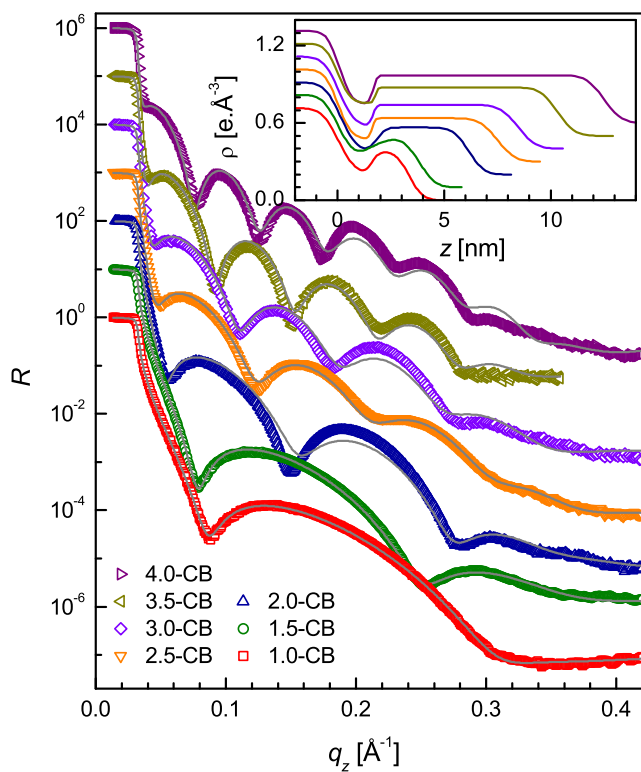

**Fig. S3** XR data (different symbols) and analyzed curves (solid line) of the spin-coated P3DDT thin films deposited from solutions of different concentrations of polymer in chlorobenzene (CB) solvent. Analysis has been carried out considering substrate and two layers. Inset: corresponding analyzed EDPs. Curves and profiles are shifted vertically for clarity.
